# Supplementary material for: Somatically mutated ABL1 is an actionable and essential NSCLC survival gene
Source: PubMed Central journal article supplement (PMC4734836; doi:10.15252/emmm.201505456), 2016-01-12

Representative Source Data for Figure 1B

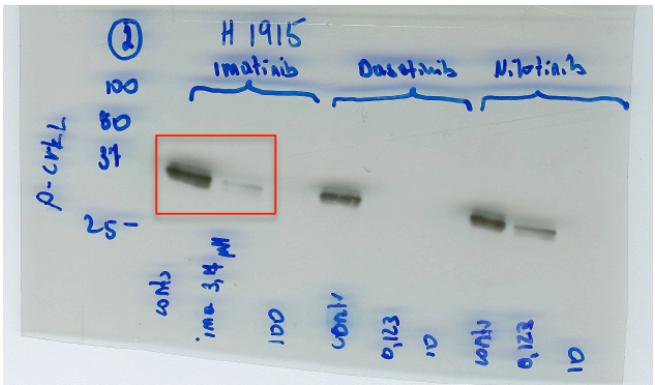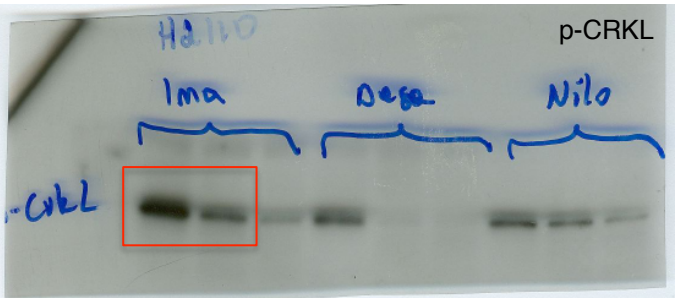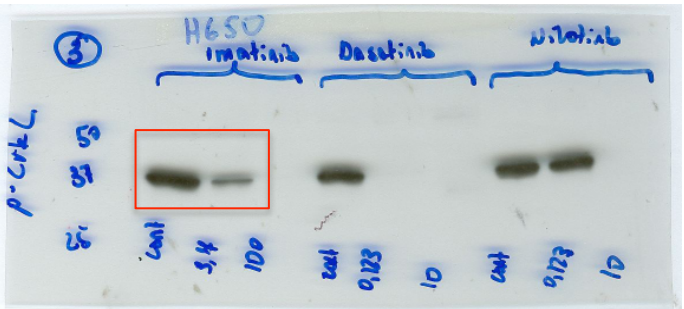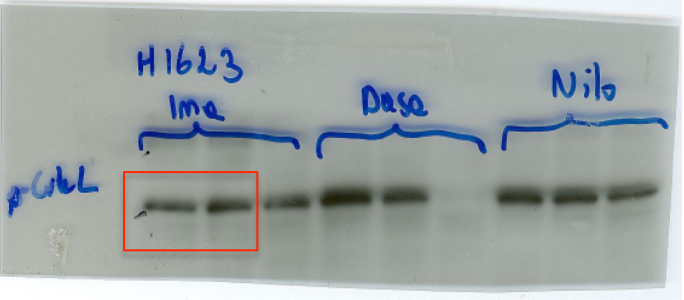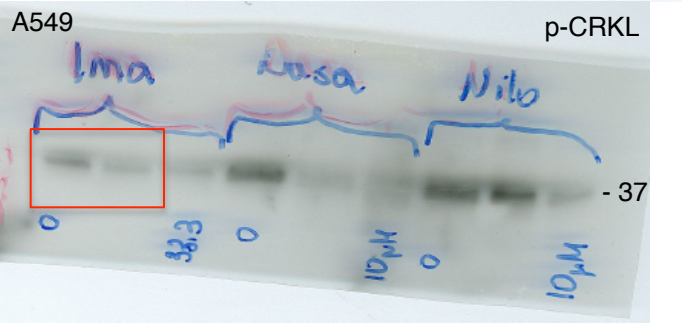

Representative Source Data for Figure 1D

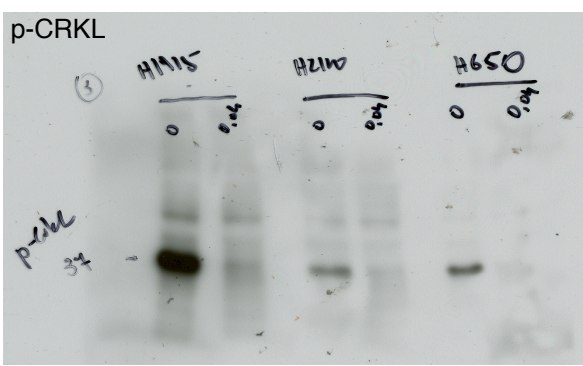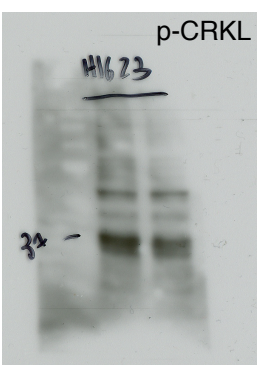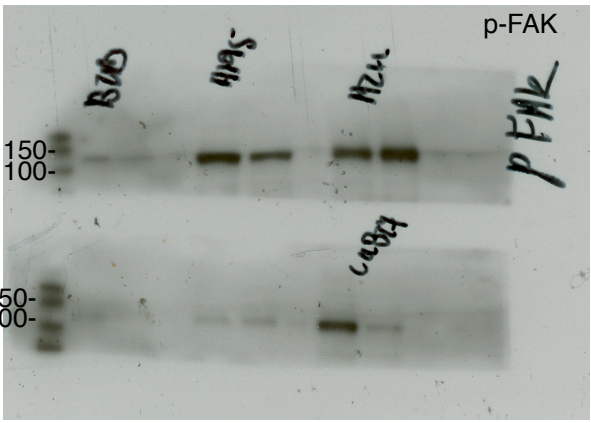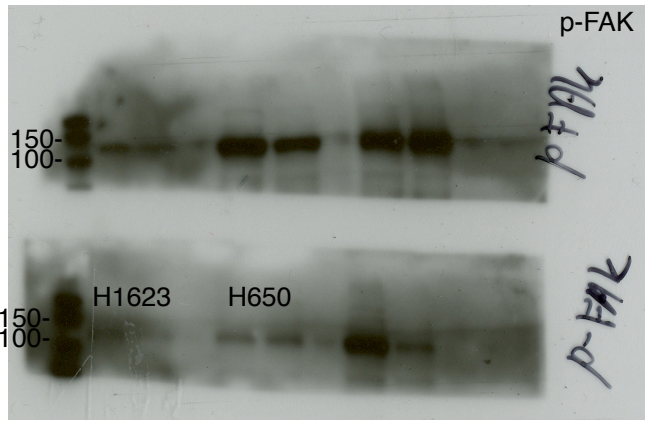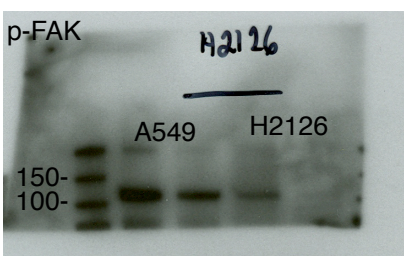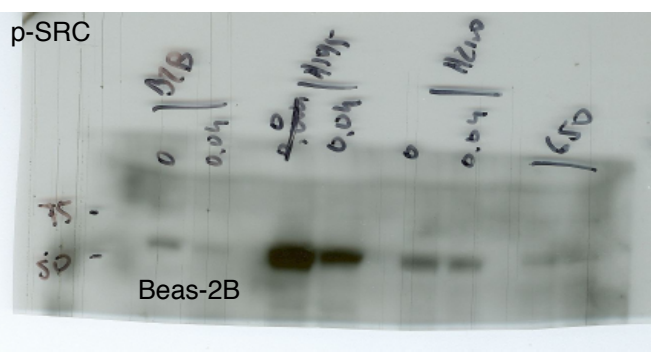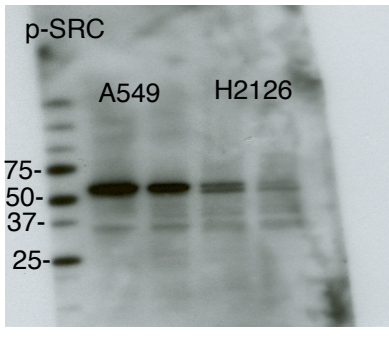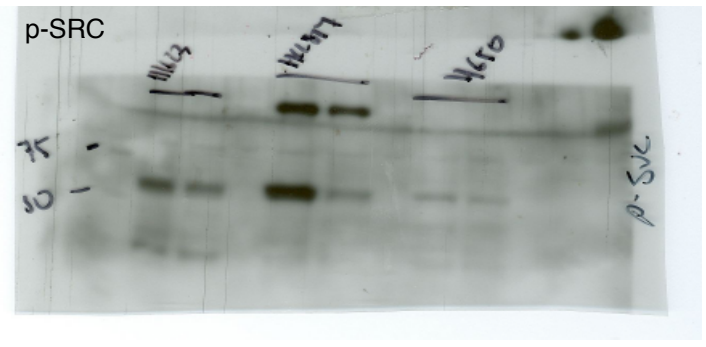

Supplement: EMMM-8-105-s003.pdf [file EMMM-8-105-s003.pdf]
