# Supplementary material for: Somatically mutated ABL1 is an actionable and essential NSCLC survival gene
Source: PubMed Central journal article supplement (PMC4734836; doi:10.15252/emmm.201505456), 2016-01-12

Source Data for Figure 4E

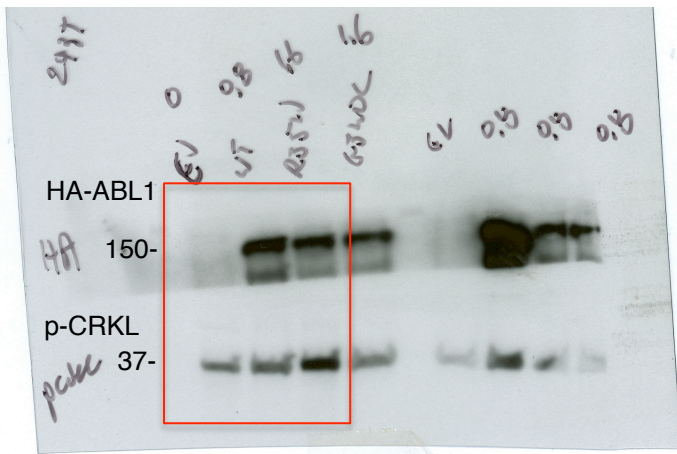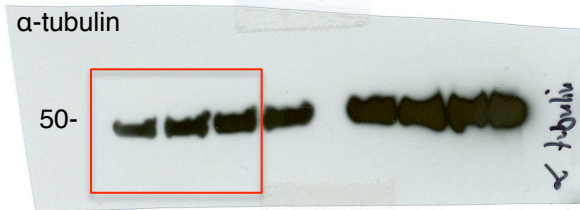

Source Data for Figure 4F

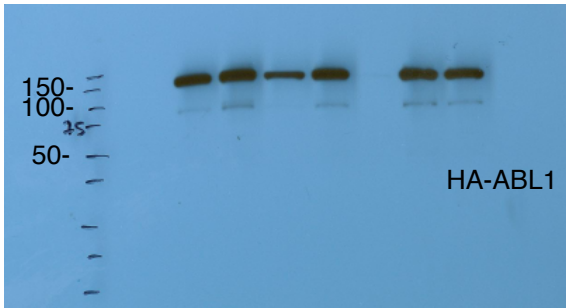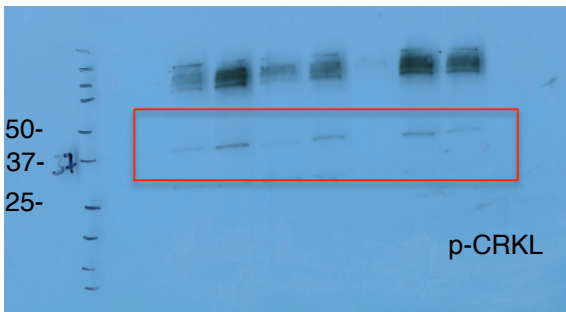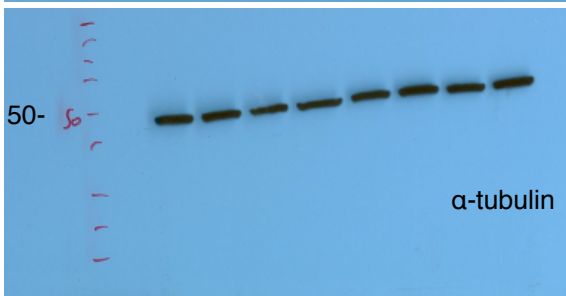

Supplement: EMMM-8-105-s005.pdf [file EMMM-8-105-s005.pdf]
